# Supplementary material for: Tailored BODIPY-based fluorogenic probes for phosgene detection: a comparative evaluation of recognition sites
Source: Royal Society of Chemistry journal article supplement (doi:10.1039/d4tb02040e), 2024-01-01
Supplement: d4tb02040e1.pdf [file d4tb02040e1.pdf]

# Tailored BODIPY-based Fluorogenic Probes for Phosgene Detection: A Comparative Evaluation of Recognition Sites

## Supporting Information

### Contents

|                                                                                 |       |
|---------------------------------------------------------------------------------|-------|
| 1. Graphs of Detection Limits of <b>BOPD</b> and <b>BOBA</b>                    | 2     |
| 2. Time Profiles of <b>BOPD</b> and <b>BOBA</b> towards Triphosgene             | 3     |
| 3. Images of <b>BOPD</b> -loaded TLC Plates                                     | 3     |
| 4. SEM micrographs of <b>BOPD</b> loaded melt-blown nonwovens                   | 4     |
| 5. NMR Characterization of Molecules                                            | 5-8   |
| 6. HRMS Results for the Sensing Mechanism                                       | 9     |
| 7. Comparison of the analytical performances of probes with literature examples | 10-11 |
| 8. References                                                                   | 12    |

## 1. Determination of Detection Limits

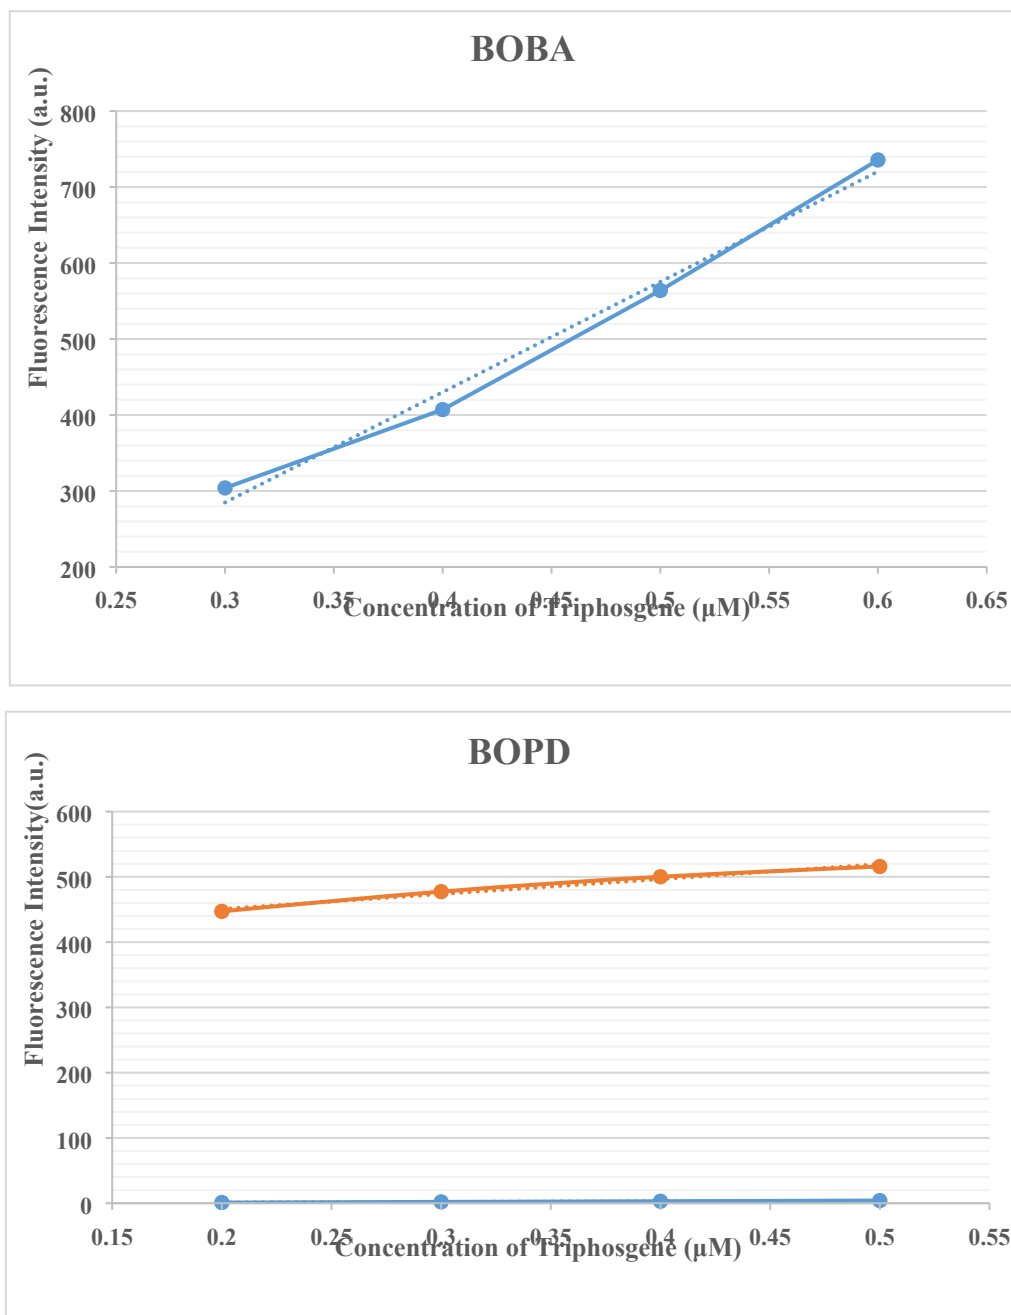

**Figure S1.** Fluorescence changes of **BOBA** (5  $\mu\text{M}$ ,  $\lambda_{\text{ex}}$ :500 nm) and **BOPD** (5  $\mu\text{M}$ ,  $\lambda_{\text{ex}}$ :500 nm) upon addition of triphosgene (0.1 to 0.9  $\mu\text{M}$ ) in  $\text{CH}_3\text{CN}$ .

## 2. Time Profiles of BOPD and BOBA towards Triphosgene

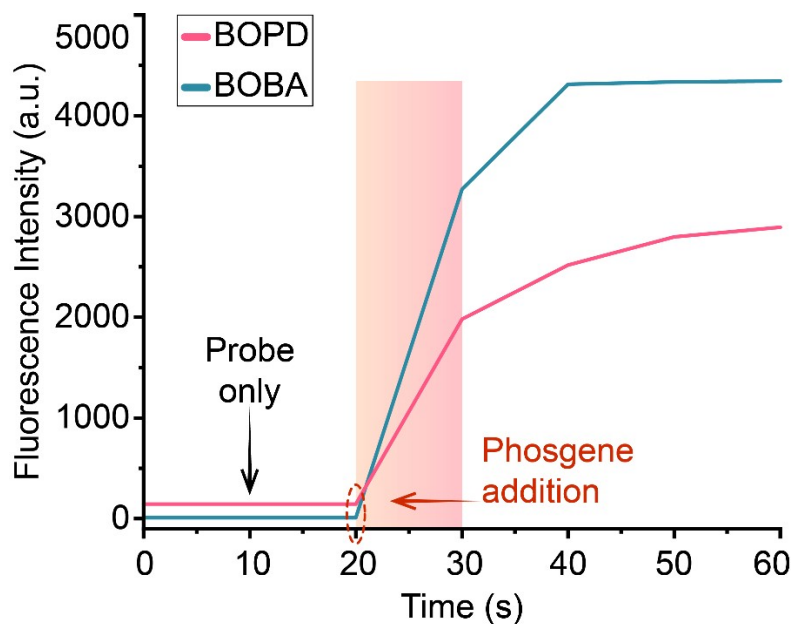

**Figure S2.** Time-dependent fluorescence change **BOBA** ( $5 \mu\text{M}$ ,  $\lambda_{\text{ex}}$ :500 nm) and **BOPD** ( $5 \mu\text{M}$ ,  $\lambda_{\text{ex}}$ :500 nm) in the presence of triphosgene (5 equiv.) in  $\text{CH}_3\text{CN}$ .

## 3. Images of BOPD-loaded TLC Plates

For the solid-state performance of **BOPD**, silica TLC plates were treated with 200  $\mu\text{L}$  **BOPD** solution. After air drying process, TLC plates were exposed to different concentrations of phosgene gas (from 0.1 ppm to 30 ppm). The production of phosgene gas was mentioned in the paper.

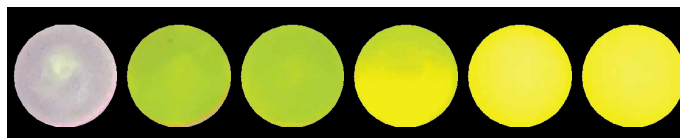

**Figure S3.** Images of fluorescence responses of TLC plates impregnated with **BOPD** (200  $\mu\text{M}$ ) upon exposure to various concentrations of phosgene gas (left to right: 0 ppm, 0.1 ppm, 5 ppm, 10 ppm, 30 ppm).

#### 4. SEM micrographs of BOPD-loaded melt-blown nonwovens

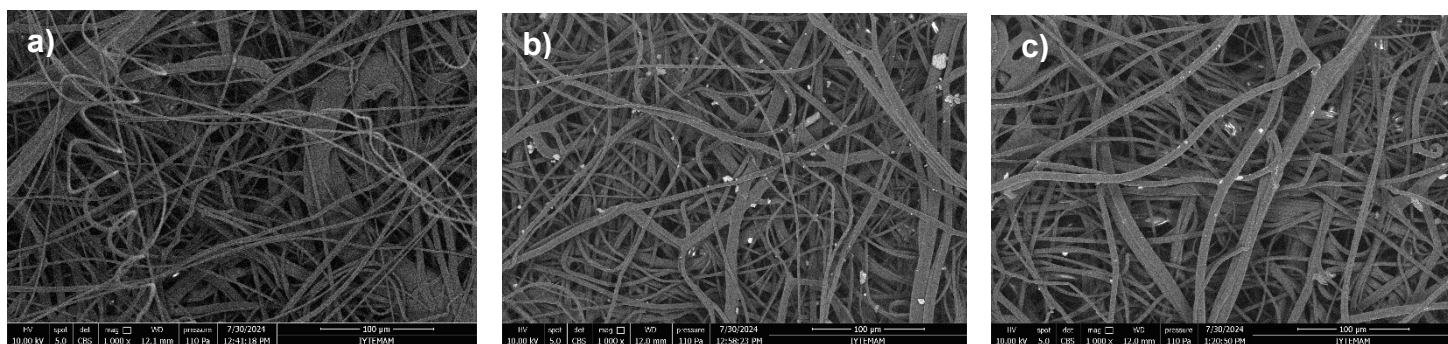

**Figure S4.** SEM images of a) only melt-blown nonwovens b) loaded with **BOPD** (200µM) c) after exposure to phosgene gas (30 ppm).

## 5. NMR Characterization of Molecules

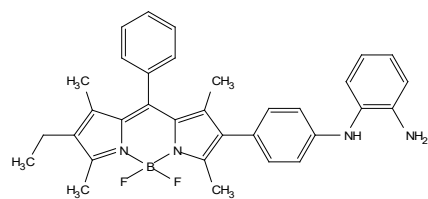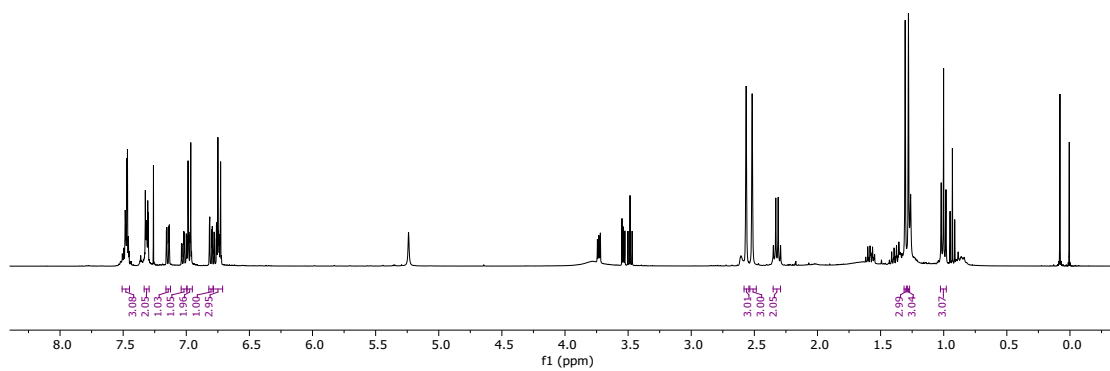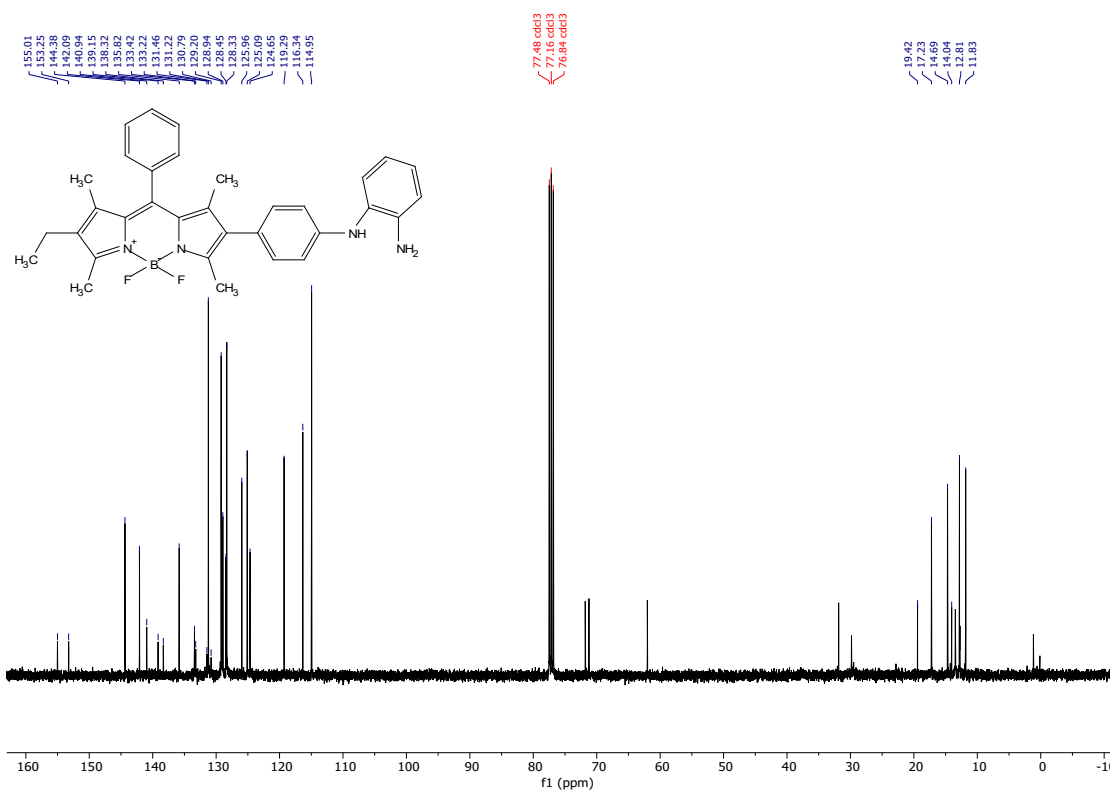

Figure S5.  $^1\text{H}$  NMR and  $^{13}\text{C}$  NMR Spectra of BOPD

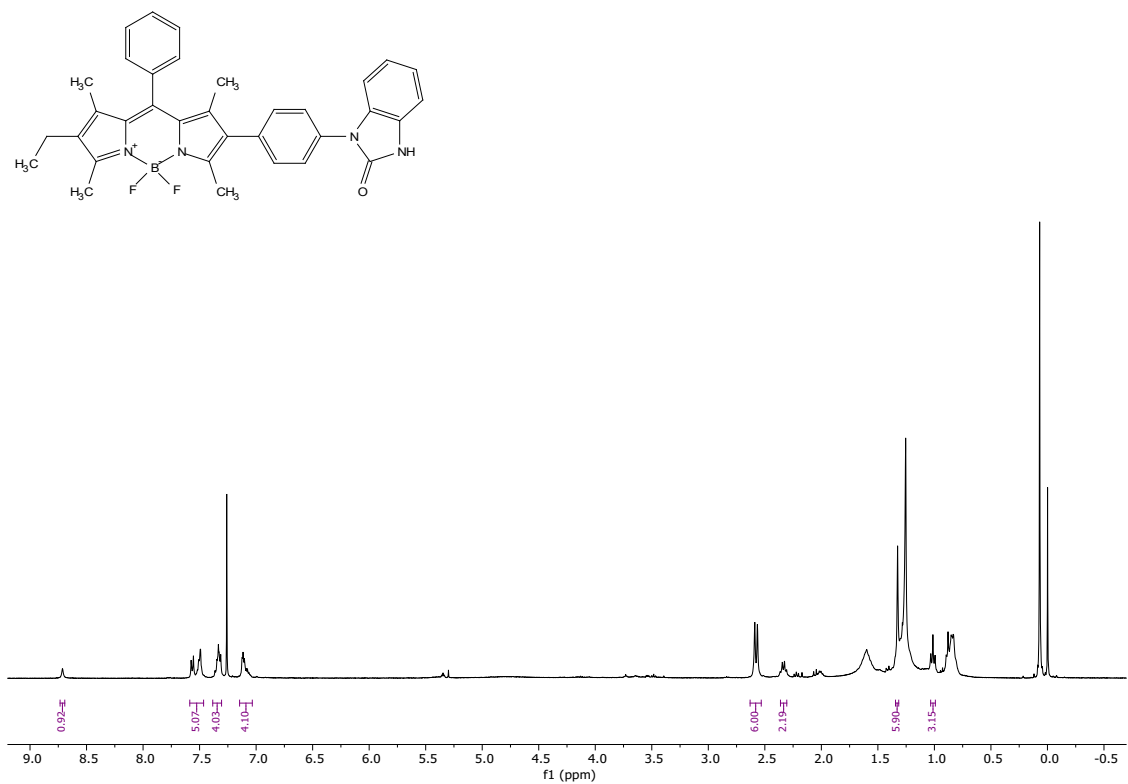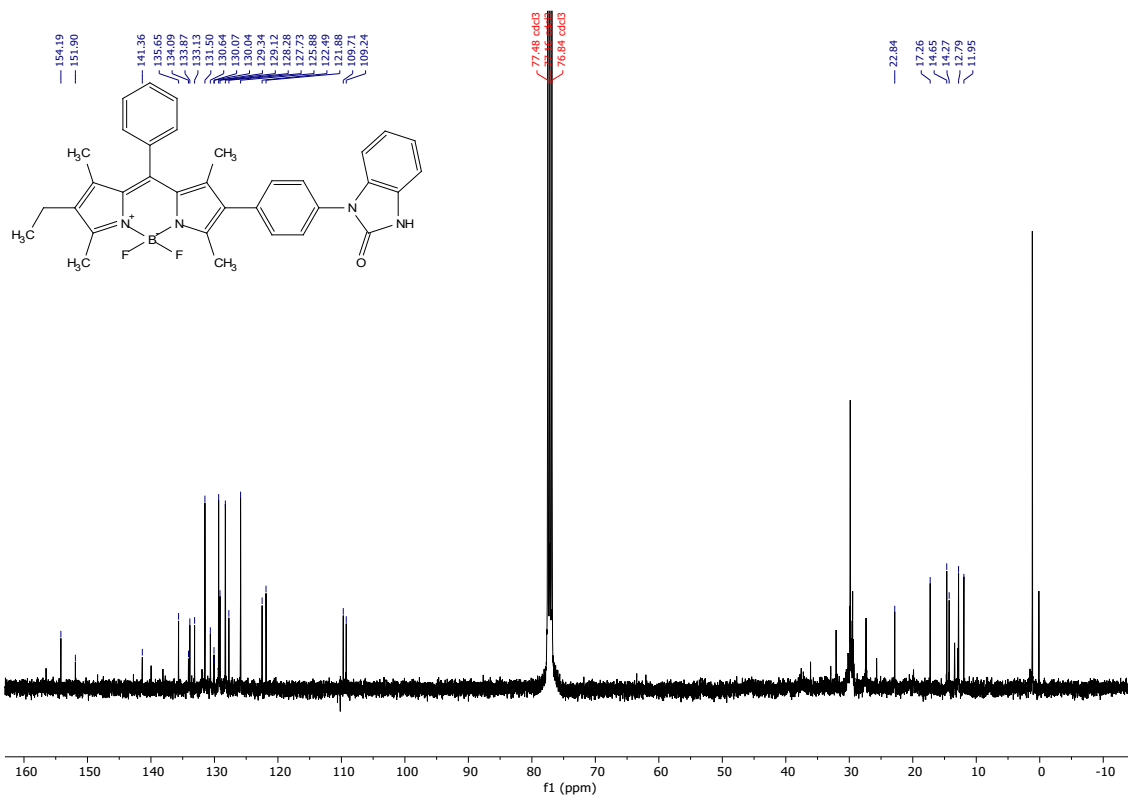

Figure S6.  $^1\text{H}$  NMR and  $^{13}\text{C}$  NMR Spectra of BOPD-PHOS

BOBA

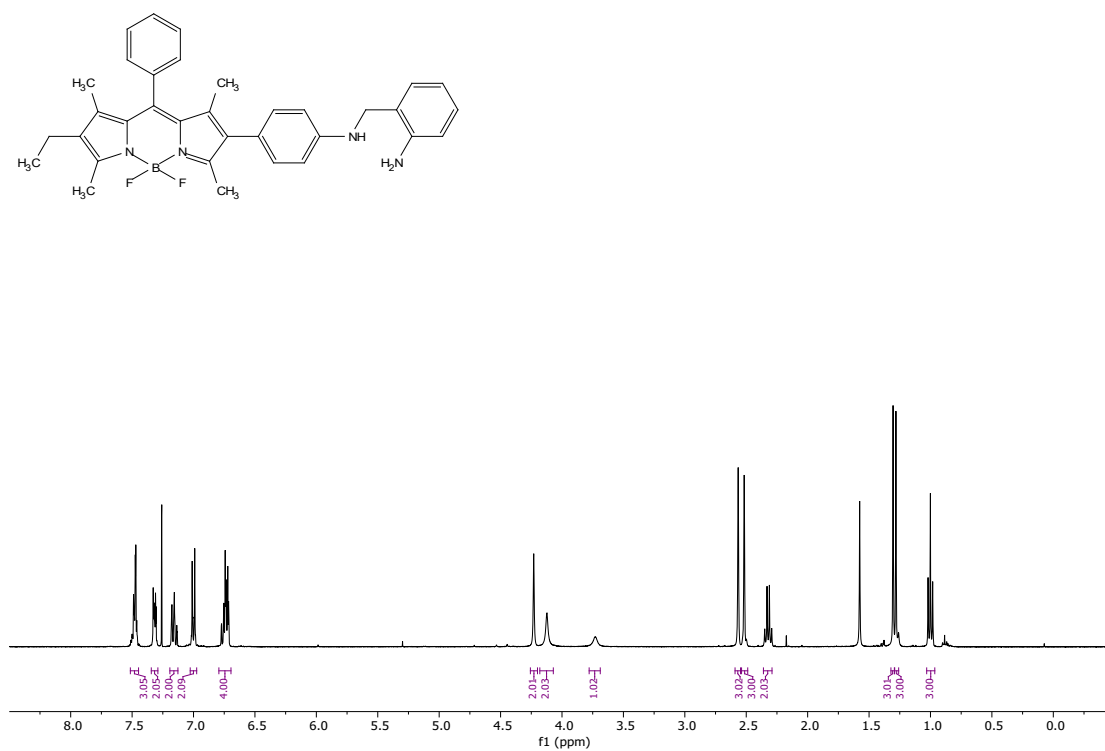

Figure S7. <sup>1</sup>H NMR Spectrum of BOBA

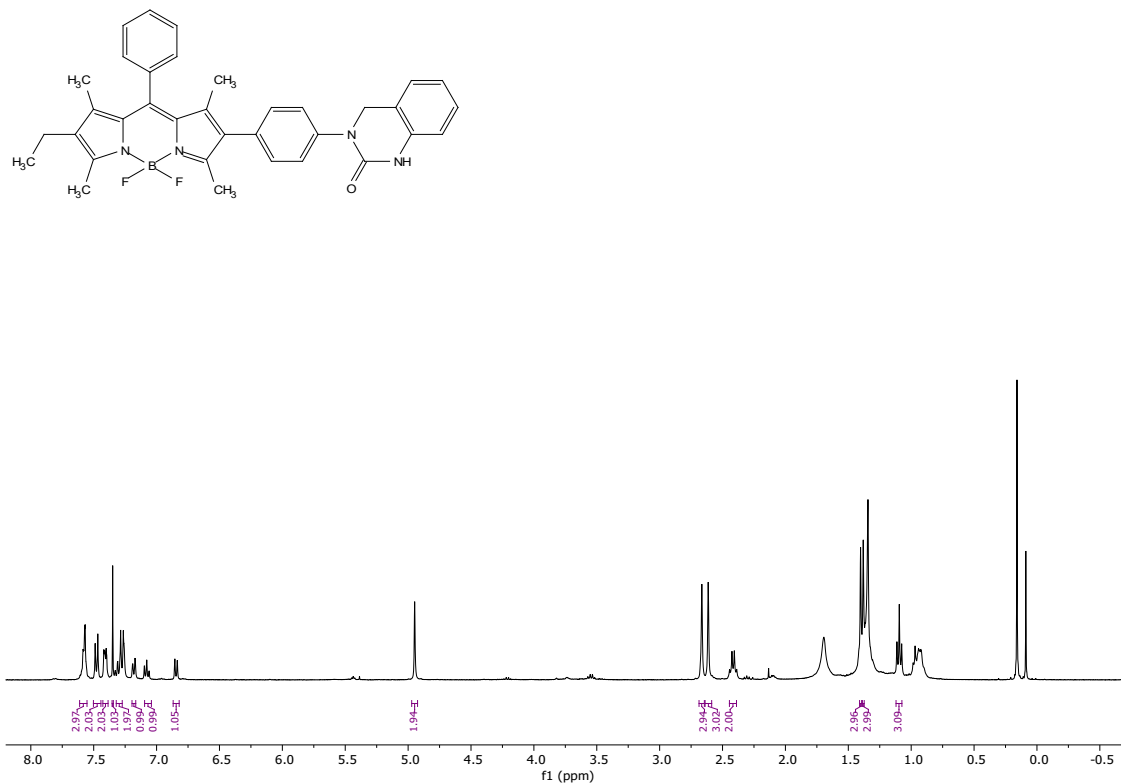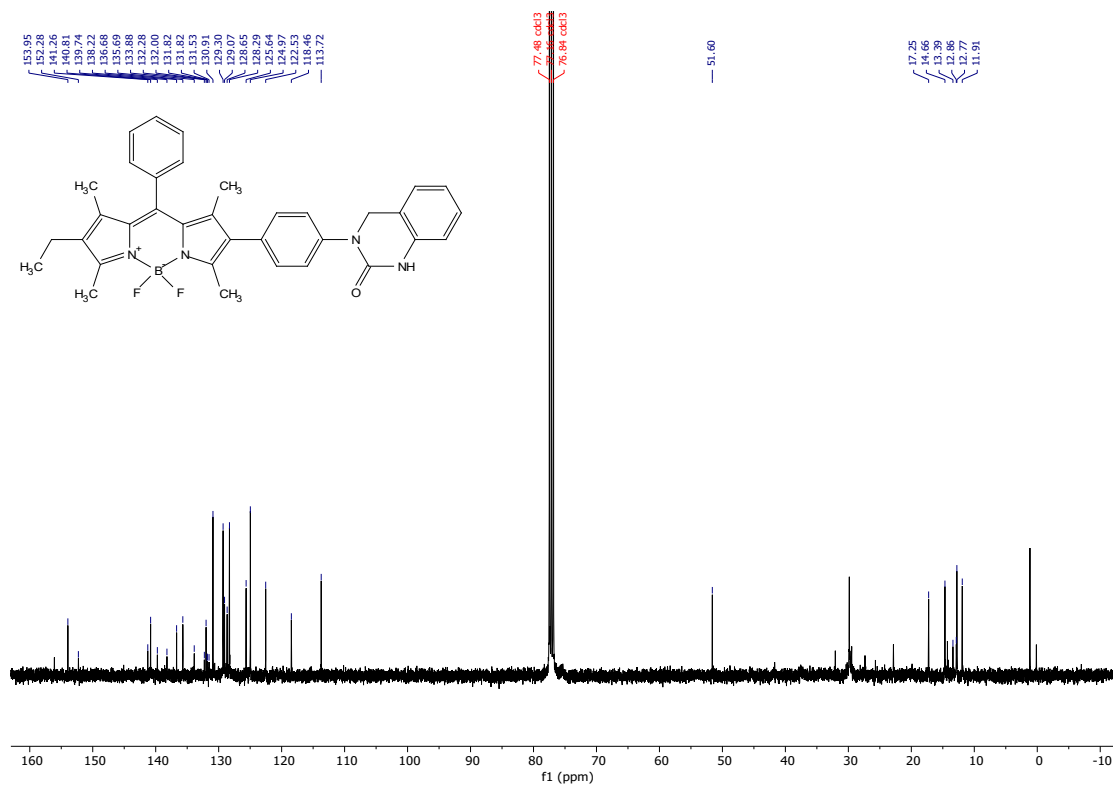

Figure S8. <sup>1</sup>H NMR and <sup>13</sup>C NMR Spectra of BOBA-PHOS



## 6. HRMS Results for the BOBA and BOPD

### User Spectra

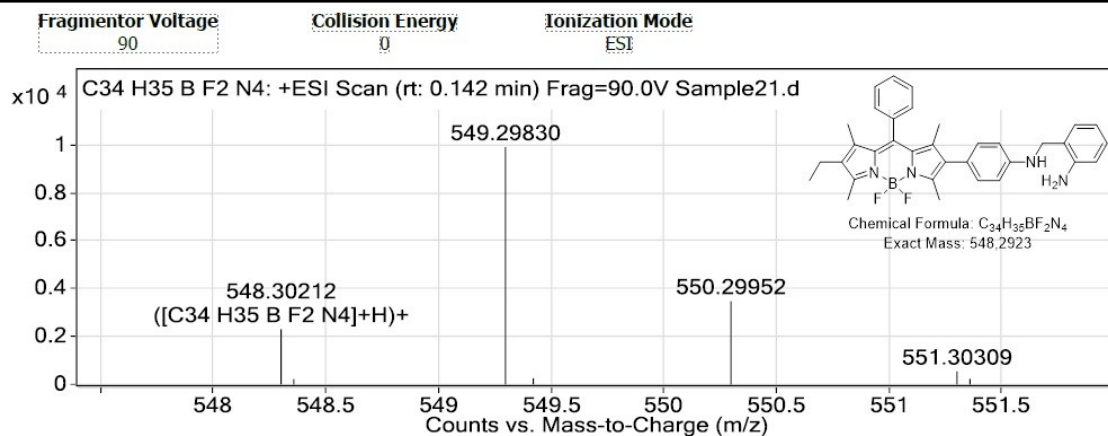

Figure S9. HRMS Spectrum of BOBA

### User Spectra

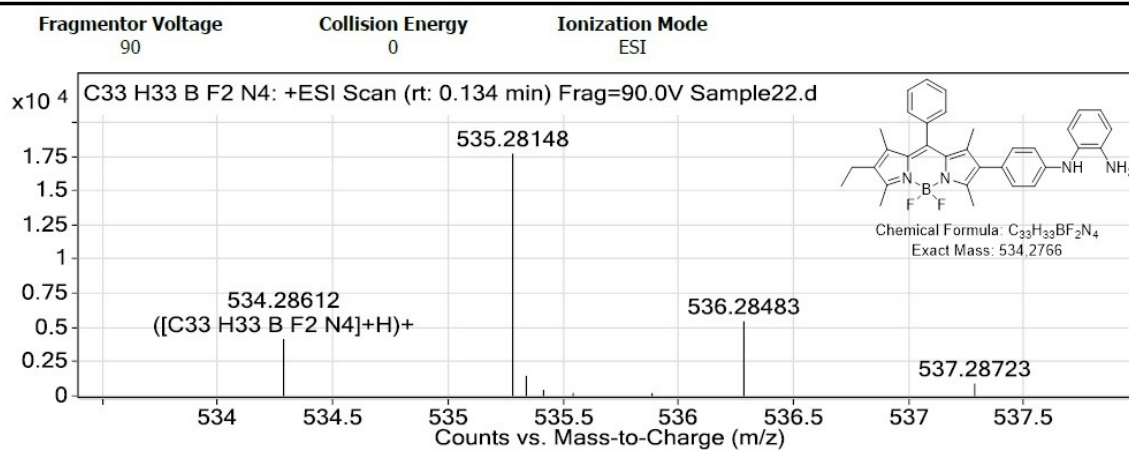

Figure S10. HRMS Spectrum of BOPD

## 7. Recently reported BODIPY-based phosgene responsive fluorescent probes

**Table S1.** Comparison of analytical performance of BODIPY-based phosgene probes

| Probe   | Structure                                                                           | Sensing Mechanism | Detection Limit | Responsive time | Switching Mechanim | Ref. No |
|---------|-------------------------------------------------------------------------------------|-------------------|-----------------|-----------------|--------------------|---------|
| o-Pab   | 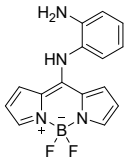   | PET               | 2.7 nM          | ~15s            | Turn-on            | 1       |
| 8-EBAB  |    | ICT               | 0.12 nM         | < 1.5s          | Turn-on            | 2       |
| 1-oxime |    | No data           | 0.31 nM         | < 10s           | Turn-on            | 3       |
| BOD-SYR |   | PET               | 179 nM          | < 10s           | Turn-on            | 4       |
| 1       |  | ICT               | 0.81 nM         | 30s             | Turn-on            | 5       |
| 2       |  | ICT               | 2.36 nM         | 2 min           | Ratiometric        | 5       |
| Bohz    |  | PET               | 0.15 nM         | 1.5s            | Turn-on            | 6       |

|                          |                                                                                     |      |                              |                    |             |           |
|--------------------------|-------------------------------------------------------------------------------------|------|------------------------------|--------------------|-------------|-----------|
| 1-CN                     | 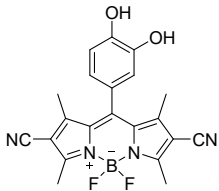   | PET  | 24 pM                        | 3s                 | Turn-on     | 7         |
| BODIPY-OHA               |    | PET  | 0.22 nM                      | 2s                 | Turn-on     | 8         |
| o-pha<br>o-pah<br>o-phac |    | TICT | 0.34 nM<br>1.2 nM<br>0.88 nM | 10s<br>200s<br>60s | Turn-on     | 9         |
| BDY                      |   | PET  | 14 nM                        | 9s                 | Turn-on     | 10        |
| ONB                      |  | PET  | 1.2 nM                       | < 2s               | Turn-on     | 11        |
| F671                     |  | FRET | 0.36 nM                      | 6s                 | Turn-on     | 12        |
| BODIPY-DCH<br>BDP-CHD    |  | PET  | 0.52 nM<br>51.4 ppt          | < 3s               | Ratiometric | 13,14     |
| BOPD                     |  | ICT  | 126 nM                       | < 10s              | Turn-on     | Our probe |

|      |                                                                                   |     |         |       |         |           |
|------|-----------------------------------------------------------------------------------|-----|---------|-------|---------|-----------|
| BOBA | 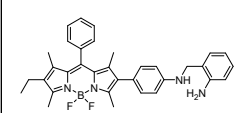 | ICT | 0.89 nM | < 30s | Turn-on | Our probe |
|------|-----------------------------------------------------------------------------------|-----|---------|-------|---------|-----------|

## 8. References

1. H.-C. Xia, X.-H. Xu and Q.-H. Song, *Analytical chemistry*, 2017, **89**, 4192–4197.
2. Y. Zhang, A. Peng, X. Jie, Y. Lv, X. Wang and Z. Tian, *ACS Applied Materials & Interfaces*, 2017, **9**, 13920–13927.
3. T.-I. Kim, B. Hwang, J. Bouffard and Y. Kim, *Analytical chemistry*, 2017, **89**, 12837–12842.
4. M. Sayar, E. Karakuş, T. Güner, B. Yildiz, U. H. Yildiz and M. Emrulloğlu, *Chemistry—A European Journal*, 2018, **24**, 3136–3140.
5. T. Cao, D. Gong, L. Zheng, J. Wang, J. Qian, W. Liu, Y. Cao, K. Iqbal, W. Qin and A. Iqbal, *Analytica Chimica Acta*, 2019, **1078**, 168–175.
6. X.-Z. Wei, Y.-L. Fu, M.-J. Xue and Q.-H. Song, *Organic letters*, 2019, **21**, 9497–9501.
7. T.-I. Kim, D. Kim, J. Bouffard and Y. Kim, *Sensors and Actuators B: Chemical*, 2019, **283**, 458–462.
8. T. Chen, L. Jiang, J.-T. Hou, W. Wang, L. Zeng and G.-M. Bao, *Journal of Materials Chemistry A*, 2020, **8**, 24695–24702.
9. Y.-L. Fu, Y.-Y. Chong, H. Li, W. Feng and Q.-H. Song, *Chemistry—A European Journal*, 2021, **27**, 4977–4984.
10. Y. Bian, Y. Wang, H. Yuan, G.-M. Bao and D. Su, *Dyes and Pigments*, 2022, **198**, 110009.
11. Y.-Y. Kong, T.-Q. Sun, M.-M. Yu and H.-C. Xia, *Analytical and Bioanalytical Chemistry*, 2022, **414**, 4953–4962.
12. J. Tan, Z. Li, W. Yao, Z. Ji, Z. Sun and J. You, *Dyes and Pigments*, 2021, **187**, 109138.
13. L. Zeng, T. Chen, B. Zhu, S. Koo, Y. Tang, W. Lin, T. D. James and J. S. Kim, *Chemical science*, 2022, **13**, 4523–4532.
14. B. Zhu, X. Yang, L. Jiang, T. Chen, S. Wang and L. Zeng, *Chinese Chemical Letters*, 2024, 110222.
